# Supplementary material
Source: PubMed Central journal article supplement (PMC9444987)
Supplement: NIHMS1828110-supplement-Supp_Materials.pdf [file NIHMS1828110-supplement-Supp_Materials.pdf]

# THE LANCET

## Haematology

### Supplementary appendix

This appendix formed part of the original submission and has been peer reviewed. We post it as supplied by the authors.

Supplement to: DeZern AE, Eapen M, Wu J, et al. Haploidentical bone marrow transplantation in patients with relapsed or refractory severe aplastic anaemia in the USA (BMT CTN 1502): a multicentre, single-arm, phase 2 trial. *Lancet Haematol* 2022; published online July 27. [https://doi.org/10.1016/S2352-3026\(22\)00206-X](https://doi.org/10.1016/S2352-3026(22)00206-X).

## APPENDIX

| <b>Page</b> | <b>Item</b>                                                                                                                                  |
|-------------|----------------------------------------------------------------------------------------------------------------------------------------------|
| 2           | Supplementary Table 1: Chronic GVHD listing                                                                                                  |
| 3           | Supplementary Table 2: Infections by Engraftment Status (GF graft failure)                                                                   |
| 4           | Supplementary Table 3: Health Related Quality of Life (HR-QoL) assessments                                                                   |
| 5           | Supplementary Table 4: Accrual by Site                                                                                                       |
| 6           | Supplementary Figure 1: Rates of Hematologic Improvement A) Neutrophil engraftment B) Platelet engraftment                                   |
| 7           | Supplementary Figure 2 Overall Survival<br>The one-year OS probability and its 95% confidence interval are estimated by Kaplan-Meier method. |
| 8           | Supplementary Figure 3: Immune reconstitution over time by Markers A) CD3 B) CD4 C) CD8 D) CD56                                              |
| 9           | BMT CTN Protocol 1502 Site List                                                                                                              |

Supplementary Table 1:

**Chronic GVHD listing**

Eight patients reported chronic GVHD reported, maximum severity and GVHD prophylaxis, treatment for these patients are listed in below table.

| <b>Maximum Chronic GVHD Severity</b> | <b>GVHD prophylaxis taken at 1 year</b> | <b>GVHD treatment taken at 1 year</b>             |
|--------------------------------------|-----------------------------------------|---------------------------------------------------|
| mild                                 | Sirolimus                               | Systemic corticosteroids                          |
| mild                                 | none                                    | Topical corticosteroids                           |
| mild                                 | Tacrolimus                              | Systemic corticosteroids                          |
| mild                                 | none                                    | Topical corticosteroids                           |
| mild                                 | none                                    | none                                              |
| mild                                 | Tacrolimus                              | Topical corticosteroids, Systemic corticosteroids |
| moderate                             | Tacrolimus                              | none                                              |
| mild                                 | Tacrolimus, beclomethasone              | none                                              |

Supplementary Table 2: Infections by Engraftment Status

|                                                               | Total                           |       | Patients With GF              |        | Patients Without GF           |       |
|---------------------------------------------------------------|---------------------------------|-------|-------------------------------|--------|-------------------------------|-------|
|                                                               | N                               | %     | N                             | %      | N                             | %     |
| <b># Patients Transplanted</b>                                | 31                              |       | 5                             |        | 26                            |       |
| <b># Patients with Infections</b>                             | 19                              | 61.3% | 5                             | 100.0% | 14                            | 53.8% |
| <b># Patients with Infection Reports</b>                      |                                 |       |                               |        |                               |       |
| =1                                                            | 7                               |       | 2                             |        | 5                             |       |
| =2                                                            | 2                               |       | 1                             |        | 1                             |       |
| =3                                                            | 2                               |       | 0                             |        | 2                             |       |
| =4                                                            | 3                               |       | 0                             |        | 3                             |       |
| =5                                                            | 3                               |       | 0                             |        | 3                             |       |
| >=6                                                           | 2                               |       | 2                             |        | 0                             |       |
| <b># Total Infection Events</b>                               | 64                              |       | 24                            |        | 40                            |       |
| Grade 2                                                       | 52                              | 81.2% | 20                            | 83.3%  | 32                            | 80.0% |
| Grade 3                                                       | 12                              | 18.8% | 4                             | 16.7%  | 8                             | 20.0% |
| <b>Maximum Severity by Patient</b>                            |                                 |       |                               |        |                               |       |
| None                                                          | 12                              | 38.7% | 0                             | 0.0%   | 12                            | 46.2% |
| Grade 2                                                       | 12                              | 38.7% | 1                             | 20.0%  | 11                            | 42.3% |
| Grade 3                                                       | 7                               | 22.6% | 4                             | 80.0%  | 3                             | 11.5% |
| <b>Infection Type (# of Patients)</b>                         |                                 |       |                               |        |                               |       |
| Bacterial                                                     | 26                              | (13)  | 9                             | (3)    | 17                            | (10)  |
| Viral                                                         | 32                              | (12)  | 12                            | (2)    | 20                            | (10)  |
| Fungal                                                        | 3                               | (3)   | 3                             | (3)    | 0                             | (0)   |
| Protozoal                                                     | 0                               | (0)   | 0                             | (0)    | 0                             | (0)   |
| Other                                                         | 3                               | (2)   | 0                             | (0)    | 3                             | (2)   |
| <b>Non-Microbial Infections (# of Patients)</b>               | 7                               | (4)   | 3                             | (2)    | 4                             | (2)   |
| <b>Incidence of CMV (# of Patients)</b>                       | 22.6% ( 7 )                     |       | 40.0% ( 2 )                   |        | 19.2% ( 5 )                   |       |
| <b>Incidence of EBV (# of Patients)</b>                       | 9.7% ( 3 )                      |       | 20.0% ( 1 )                   |        | 7.7% ( 2 )                    |       |
| <b>Incidence of PTLD (# of Patients)</b>                      | 6.5% ( 2 )                      |       | 0.0% ( 0 )                    |        | 7.7% ( 2 )                    |       |
| <b>Cumulative Incidence of Grades 2-3infections at 1 year</b> | 58.1%<br>(95% CI: 38.4%, 73.5%) |       | 100%<br>(95% CI: 47.8%, 100%) |        | 50%<br>(95% CI: 29.3%, 67.6%) |       |

Supplementary Table 3: Health Related Quality of Life (HR-QoL) assessments

| HR-QoL Measurement | Change at Day 100 from baseline |             |         | Change at 6 Months from baseline |            |         | Change at 1 Year from baseline |             |         |
|--------------------|---------------------------------|-------------|---------|----------------------------------|------------|---------|--------------------------------|-------------|---------|
|                    | N                               | Mean (SD)   | P-Value | N                                | Mean (SD)  | P-Value | N                              | Mean (SD)   | P-Value |
| SFH MCS            | 14                              | 4.8 (14.0)  | 0.220   | 14                               | 6.0 (10.2) | 0.047   | 9                              | 2.2 (10.7)  | 0.562   |
| SFH PCS            | 14                              | 4.0 (13.8)  | 0.292   | 14                               | 6.6 (11.6) | 0.053   | 9                              | 10.4 (6.6)  | 0.002*  |
| PedsQL             | 7                               | 11.4 (16.2) | 0.111   | 8                                | 9.5 (15.4) | 0.123   | 6                              | 18.7 (11.1) | 0.009*  |

\*P values <0.01 are statistically significant. P-value from paired t-test.

HR-QoL data were analyzed for changes in mean score from baseline measurement and performed as an exploratory analysis, given the small sample size. A paired Student t test was used to assess changes from baseline to each posttransplant time point (day 100, 6 months, and 1 year). Only P values of <.01 were considered significant for the analyses, given the multiple comparisons.

Supplementary Table 4: Accrual by Site

| Site                                         | PI Name                      | Total Accrual |
|----------------------------------------------|------------------------------|---------------|
| All Children's Hospital                      | Oshrine                      | .             |
| BMT Group of Georgia                         | Solh                         | 3             |
| Baylor College of Med/The Methodist Hospital | Sasa                         | .             |
| Children's Hospital Los Angeles              | Pulsipher                    | 2             |
| Children's Hospital at Oakland               | Lalefar                      | .             |
| Children's Mercy Hospital and Clinics        | Goyal                        | .             |
| Children's National Medical Center           | Abraham, Davila-Saldana      | 1             |
| City of Hope National Medical Center         | Karanes, Sahebi              | 3             |
| Duke University Medical Center               | Horwitz, Parikh, Kurtzberg   | 1             |
| Fred Hutchinson Cancer Research Center       | Burroughs, Mallhi, Mielcarek | 2             |
| H. Lee Moffitt Cancer Center                 | Perez, Pidala                | .             |
| Hackensack University Medical Center         | Gillio                       | .             |
| Indiana University Med Center/Riley Hospital | Delgado, Skiles              | .             |
| Johns Hopkins University                     | DeZern                       | 8             |
| Karmanos Cancer Institute                    |                              | 1             |
| MD Anderson Cancer Research Center           | Ciurea, Bashir, Patel        | .             |
| Medical College of Wisconsin                 | Talano                       | 4             |
| Miami Children's Health System               | Godder                       | 3             |
| Oregon Health Sciences University            | Shereck                      | .             |
| Penn state/Milton S Hershey Medical Center   | Greiner                      | .             |
| Roswell Park Cancer Institute                | Bambach                      | .             |
| Stanford Hospital and Clinics                | Arai, Muffly                 | 1             |
| Texas Transplant Institute                   | Quigg                        | .             |
| University of Florida College of Medicine    | Wingard                      | 1             |
| University of Louisville                     |                              | .             |
| University of Michigan Medical Center        | Vander Lugt                  | .             |
| University of Pennsylvania Hospital Center   | Hexner                       | 1             |
| Washington University of St. Louis           | Westervelt                   | 1             |

# Supplementary Figure 1

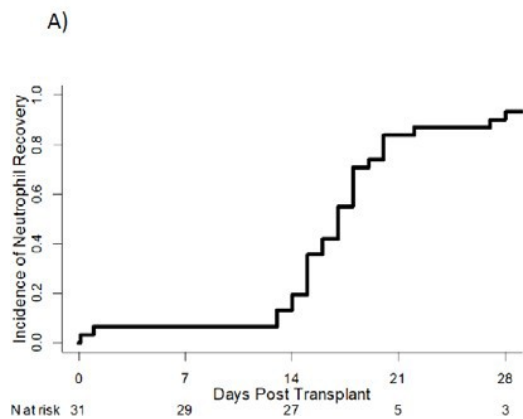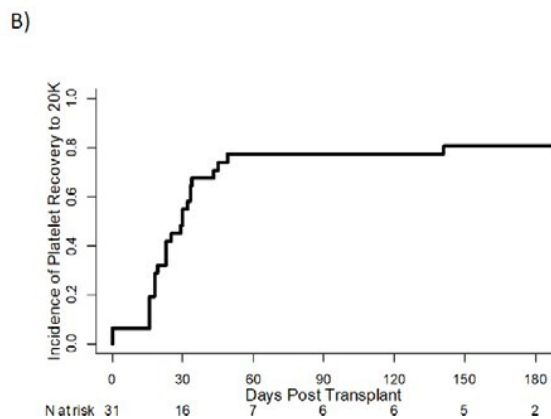

SUPPLEMENTARY FIGURE 2

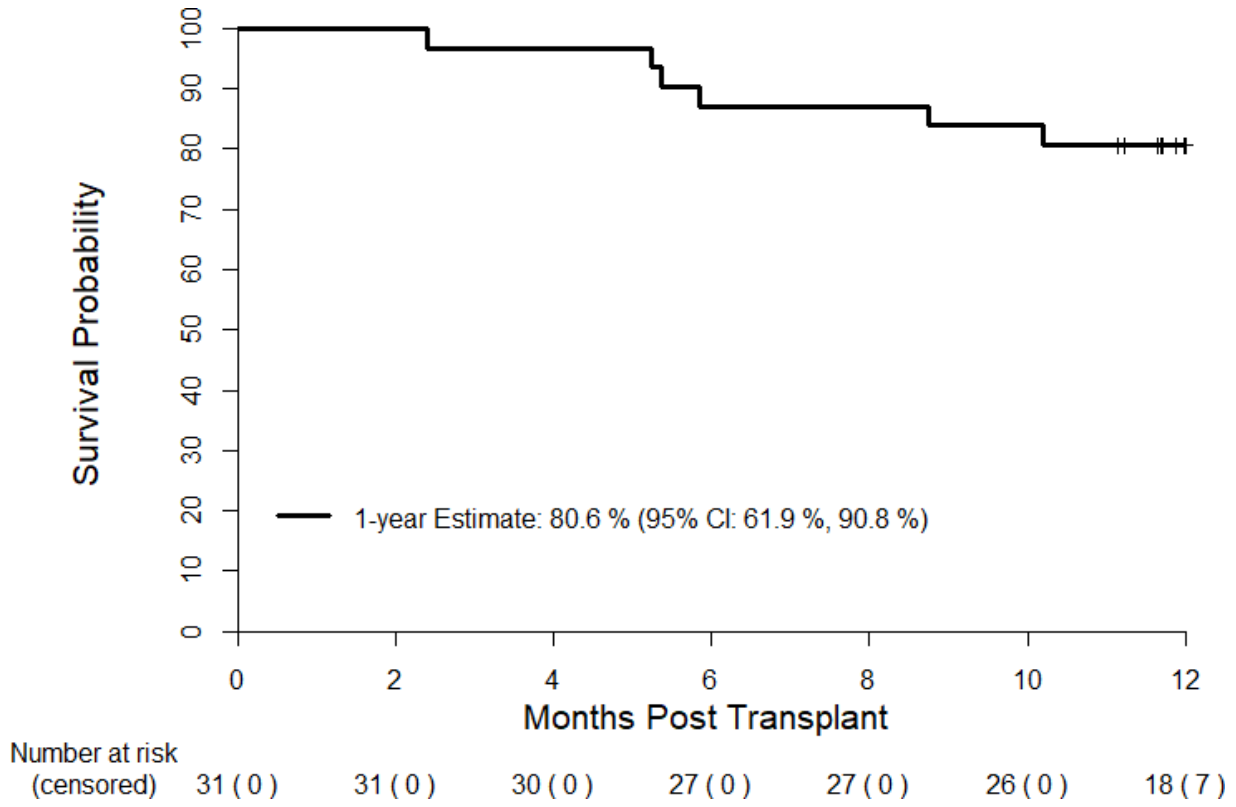



SUPPLEMENTARY FIGURE 3:

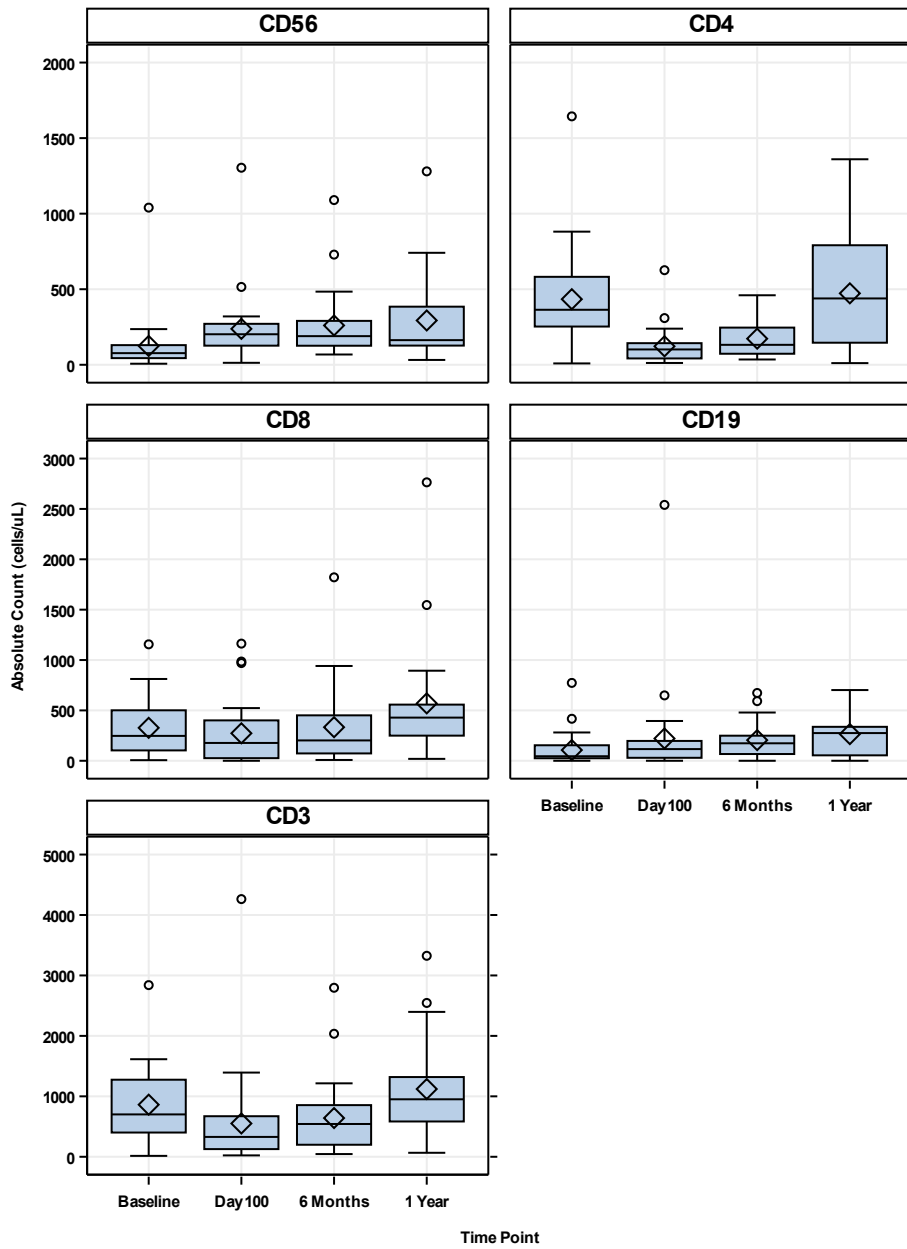

**BMT CTN Protocol 1502 Site List**

| <b>Center</b>                                                 | <b>Total<br/>Accr<br/>ual<br/>#</b> | <b>PI</b>                                                    |
|---------------------------------------------------------------|-------------------------------------|--------------------------------------------------------------|
| Johns Hopkins/SKCCC                                           | 8                                   | Amy DeZern, MD, MHS                                          |
| Medical College of Wisconsin/Children's Hospital of Wisconsin | 4                                   | Julie-An Talano, MD                                          |
| Blood & Marrow Transplant Program at Northside Hospital       | 3                                   | Melhem Solh, MD                                              |
| City of Hope National Medical Center                          | 3                                   | Chatchada Karanes, MD                                        |
| Miami Children's Hospital                                     | 3                                   | Jorge Ricardo Galvez Silva, MD                               |
| Children's Hospital Los Angeles                               | 2                                   | Mike Pulsipher, MD                                           |
| Fred Hutchinson Cancer Research Center                        | 2                                   | Lauri Burroughs, MD, Kanwaldeep Mallhi, MD, Joachim Deeg, MD |
| Children's National Medical Center                            | 1                                   | Blachy Davila-Saldana, MD                                    |
| Duke University Medical Center                                | 1                                   | Mitchell Horwitz, MD, Joanne Kurtzberg, MD                   |
| Karmanos Cancer Institute/Children's Hospital of Michigan     | 1                                   | Sureyya Savasan, MD                                          |
| Stanford Hospital and Clinics                                 | 1                                   | Sally Arai, MD, Rajni Agarwal, MD                            |
| University of Florida College of Medicine (Shands)            | 1                                   | John Wingard, MD                                             |
| University of Pennsylvania Cancer Center                      | 1                                   | Elizabeth Hexner, MD                                         |
| Washington University/Barnes Jewish Hospital                  | 1                                   | Peter Westervelt, MD, PhD                                    |
| <b>Total</b>                                                  | <b>32</b>                           |                                                              |
